# Supplementary material for: Physcomitrella Patens Dehydrins (PpDHNA and PpDHNC) Confer Salinity and Drought Tolerance to Transgenic Arabidopsis Plants
Source: Front Plant Sci. 2017 Jul 26;8:1316. doi: 10.3389/fpls.2017.01316 (PMC5526925; doi:10.3389/fpls.2017.01316)
Supplement: Table S2 — The sequences of PCR primers for cloning. [file Table2.XLSX]

## Sheet: Sheet1
Primer name	Sequence (5' to 3')	Annotation
pLEA3-PstI-F	AACTGCAGGACAATAGACGGTTCTAGC	Transgenic vector constructions: pLEA::PpDHNA, pLEA::PpDHNA::GFP and 35S::PpDHNA::GFP
pLEA3-SalI-R	GAAGTCGACGGAAGCATTGTTGTTAAG
PpDHNA-XbaI-F	GCTCTAGAAATCATCGACAATC
PpDHNA-BamHI-R	CGGGATCCGTGGTGCAGCTTCTC
PpDHNA-SalI-F	GAAGTCGACTAGAAATCATCGACAATC
pLEA3-HindIII-F	CCCAAGCTTCTCTATACCTAAGAGC	Transgenic vector constructions: pLEA::PpDHNC, pLEA::PpDHNC::GFP and 35S::PpDHNC::GFP
pLEA3-SalI-R	GAAGTCGACTCTAACAACGACACTCACTC
PpDHNC-XbaI-F	GCTCTAGAATGGCTGGGTACATG
PpDHNC-BglII-R	GAAGATCTCACGTCAGCGCTGCC
PpDHNC-PstI-F	CTGCAGATGGCTGGGTACATG
